# Supplementary material for: Implications of circulating neurofilaments for spinal muscular atrophy treatment early in life: A case series
Source: PubMed Central journal article supplement — Mol Ther Methods Clin Dev. 2021 Oct 30;23:524–38. doi: 10.1016/j.omtm.2021.10.011 (PMC8605296; doi:10.1016/j.omtm.2021.10.011), 2021-10-30
Supplement: mmc1.pdf [file mmc1.pdf]

**OMTM, Volume 23**

**Supplemental information**

**Implications of circulating neurofilaments**

**for spinal muscular atrophy**

**treatment early in life: A case series**

**Christiano R.R. Alves, Marco Petrillo, Rebecca Spellman, Reid Garner, Ren Zhang, Michael Kiefer, Sarah Simeone, Jihee Sohn, Eric J. Eichelberger, Emma Rodrigues, Elizabeth A. Arruda, Elise L. Townsend, Wildon Farwell, and Kathryn J. Swoboda**

**Table S1.** Source used to determine milestones in each SMA patient receiving nusinersen and/or onasemnogene abeparvovec early in life.

| <i>Subject ID</i>               | <i>Elicited (E) or Independent Rolling</i> | <i>Sitting Independently</i> | <i>Standing Supported</i>            | <i>Walking Independently</i> |
|---------------------------------|--------------------------------------------|------------------------------|--------------------------------------|------------------------------|
| <i>Nusinersen</i>               |                                            |                              |                                      |                              |
| 507                             | HINE-2 (3)                                 | HINE-2 (3)                   | HINE-2 (2)                           | -                            |
| 556                             | -                                          | -                            | -                                    | -                            |
| 618                             | Parent reported no video                   | Parent reported no video     | -                                    | -                            |
| 630                             | Parent reported no video                   | -                            | -                                    | -                            |
| 508                             | CHOP-INTEND items 6/7 (4) (E)              | HINE-2 (3)                   | HINE-2 (2)                           | HINE-2 (3)                   |
| 579                             | HFMSE items 8/9 (2)                        | HFMSE item 1 (2)             | Parent reported no video             | HFMSE item 20 (2)            |
| 615                             | CHOP-INTEND items 6/7 (3) (E)              | WHO-MM 10s                   | WHO-MM                               | WHO-MM                       |
| 634                             | Parent reported no video                   | Parent reported no video     | Parent reported with video           | -                            |
| 829                             | HINE-2 (3) (E)                             | HINE-2 (3)                   | -                                    | -                            |
| <i>Onasemnogene abeparvovec</i> |                                            |                              |                                      |                              |
| 669                             | BSID-III item 25                           | WHO-MM 10s                   | WHO-MM                               | BSID-III item 43             |
| 813                             | CHOP-INTEND items 6/7 (3) (E)              | BSID-III item 26 30s         | BSID-III item 33                     | BSID-III item 43             |
| 825                             | CHOP-INTEND item 7 (4) (E)                 | HINE-2 (3)                   | WHO-MM                               | WHO-MM                       |
| 849                             | CHOP-INTEND items 6/7 (3) (E)              | WHO-MM 10s                   | HINE-2 (2), WHO-MM, BSID-III item 33 | Parent reported with video   |
| 907                             | CHOP-INTEND items 6/7 (4) (E)              | BSID-III item 26 30s         | WHO-MM and BSID-III item 33          | WHO-MM                       |
| 818                             | CHOP-INTEND items 6/7 (3) (E)              | WHO-MM 10s                   | WHO-MM                               | Parent reported with video   |
| 851                             | CHOP-INTEND item 7 (3) (E)                 | WHO-MM 10s                   | WHO-MM                               | WHO-MM                       |
| <i>Co-therapy</i>               |                                            |                              |                                      |                              |
| 571                             | CHOP-INTEND items 6/7 (3) (E)              | Parent reported with video   | HINE-2 (2)                           | -                            |
| 809                             | CHOP-INTEND items 6/7 (3) (E)              | HINE-2 (3)                   | BSID-III item 33                     | -                            |
| 832                             | CHOP-INTEND items 6/7 (3) (E)              | Parent reported no video     | Parent reported with video           | -                            |
| 846                             | CHOP-INTEND items 6/7 (3) (E)              | Parent reported no video     | -                                    | -                            |
| 913                             | CHOP-INTEND items 6/7 (3) (E)              | HINE-2 (3)                   | HINE-2 (2), WHO-MM, BSID-III item 33 | -                            |
| 927                             | CHOP-INTEND items 6/7 (3) (E)              | WHO-MM 10s                   | WHO-MM                               | -                            |

**Table S2.** Demographic and clinical characteristics of SMA patients and healthy controls.

|                            | <b>Controls</b><br>(n = 10) | <b>Natural History</b><br>(n = 47) | <b>Nusinersen</b><br>(n = 9) | <b>Onasemnogene<br/>abeparvovec</b><br>(n = 7) | <b>Co-Therapy</b><br>(n = 6) |
|----------------------------|-----------------------------|------------------------------------|------------------------------|------------------------------------------------|------------------------------|
| <b>Age (days)</b>          | 57.4 ± 102.1 (0-360)        | 874.5 ± 879.7 (3-3791)             | 458.4 ± 329.8 (28-1082)      | 321.7 ± 216.7 (39-928)                         | 389.5 ± 305.8 (56-1056)      |
| <b>Sex, no. (%)</b>        |                             |                                    |                              |                                                |                              |
| Male                       | 4 (40.0)                    | 28 (59.6)                          | 4 (44.4)                     | 5 (71.4)                                       | 3 (50.0)                     |
| Female                     | 6 (60.0)                    | 19 (40.4)                          | 5 (55.6)                     | 2 (28.6)                                       | 3 (50.0)                     |
| <b>Race, no. (%)</b>       |                             |                                    |                              |                                                |                              |
| White                      | 9 (90.0)                    | 43 (91.5)                          | 8 (88.9)                     | 5 (71.4)                                       | 6 (100.0)                    |
| Asian                      | 1 (10.0)                    | 3 (6.4)                            | –                            | 1 (14.3)                                       | –                            |
| Black                      | –                           | –                                  | 1 (11.1)                     | –                                              | –                            |
| Unknown                    | –                           | 1 (2.1)                            | –                            | 1 (14.3)                                       | –                            |
| <b>Ethnicity, no. (%)</b>  |                             |                                    |                              |                                                |                              |
| Hispanic or Latino         | 1 (10.0)                    | 8 (17.0)                           | 6 (66.7)                     | 4 (57.1)                                       | 5 (83.3)                     |
| Not Hispanic/Latino        | 9 (90.0)                    | 39 (83.0)                          | 3 (33.3)                     | 3 (42.9)                                       | 1 (16.7)                     |
| <b>SMN2, no. (%)</b>       |                             |                                    |                              |                                                |                              |
| 2                          | –                           | 24 (42.1)                          | 4 (44.4)                     | 1 (14.3)                                       | 6 (100.0)                    |
| 3                          | –                           | 18 (31.6)                          | 5 (55.6)                     | 4 (57.1)                                       | –                            |
| 4+                         | –                           | 3 (5.3)                            | –                            | 2 (28.6)                                       | –                            |
| <b>SMA Type, no. (%)</b>   |                             |                                    |                              |                                                |                              |
| Type 1                     | –                           | 25 (53.2)                          | 2 (22.2)                     | –                                              | 4 (66.7)                     |
| Type 2                     | –                           | 18 (34.0)                          | 4 (44.4)                     | –                                              | 1 (16.7)                     |
| Type 3                     | –                           | 3 (6.4)                            | 1 (11.1)                     | –                                              | –                            |
| Presymptomatic             | –                           | 3 (6.4)                            | 2 (22.2)                     | 7 (100.0)                                      | 1 (16.7)                     |
| <b>pNf-H (pg/mL)</b>       | 498 ± 261 (177-1092)        | 6092 ± 6710 (123-29060)            | 2797 ± 3864 (208-19431)      | 8127 ± 6320 (1367-29788)                       | 3787 ± 306 (597-16940)       |
| <b>Nf-L (pg/mL)</b>        | 10 ± 5 (3–19)               | 112 ± 198 (4-1826)                 | 45 ± 57 (7-267)              | 121 ± 97 (22-433)                              | 56 ± 49 (8-178)              |
| <b>CMAP Amplitude (mv)</b> | 12.0 ± 4.0 (9.1-14.8)       | 3.2 ± 3.2 (0-13.3)                 | 5.7 ± 3.6 (0.4-12.1)         | 7.1 ± 3.0 (0.4-12.1)                           | 1.6 ± 0.8 (0.5-3.3)          |

Data is presented as mean ± SD (range) or number of subjects (%)

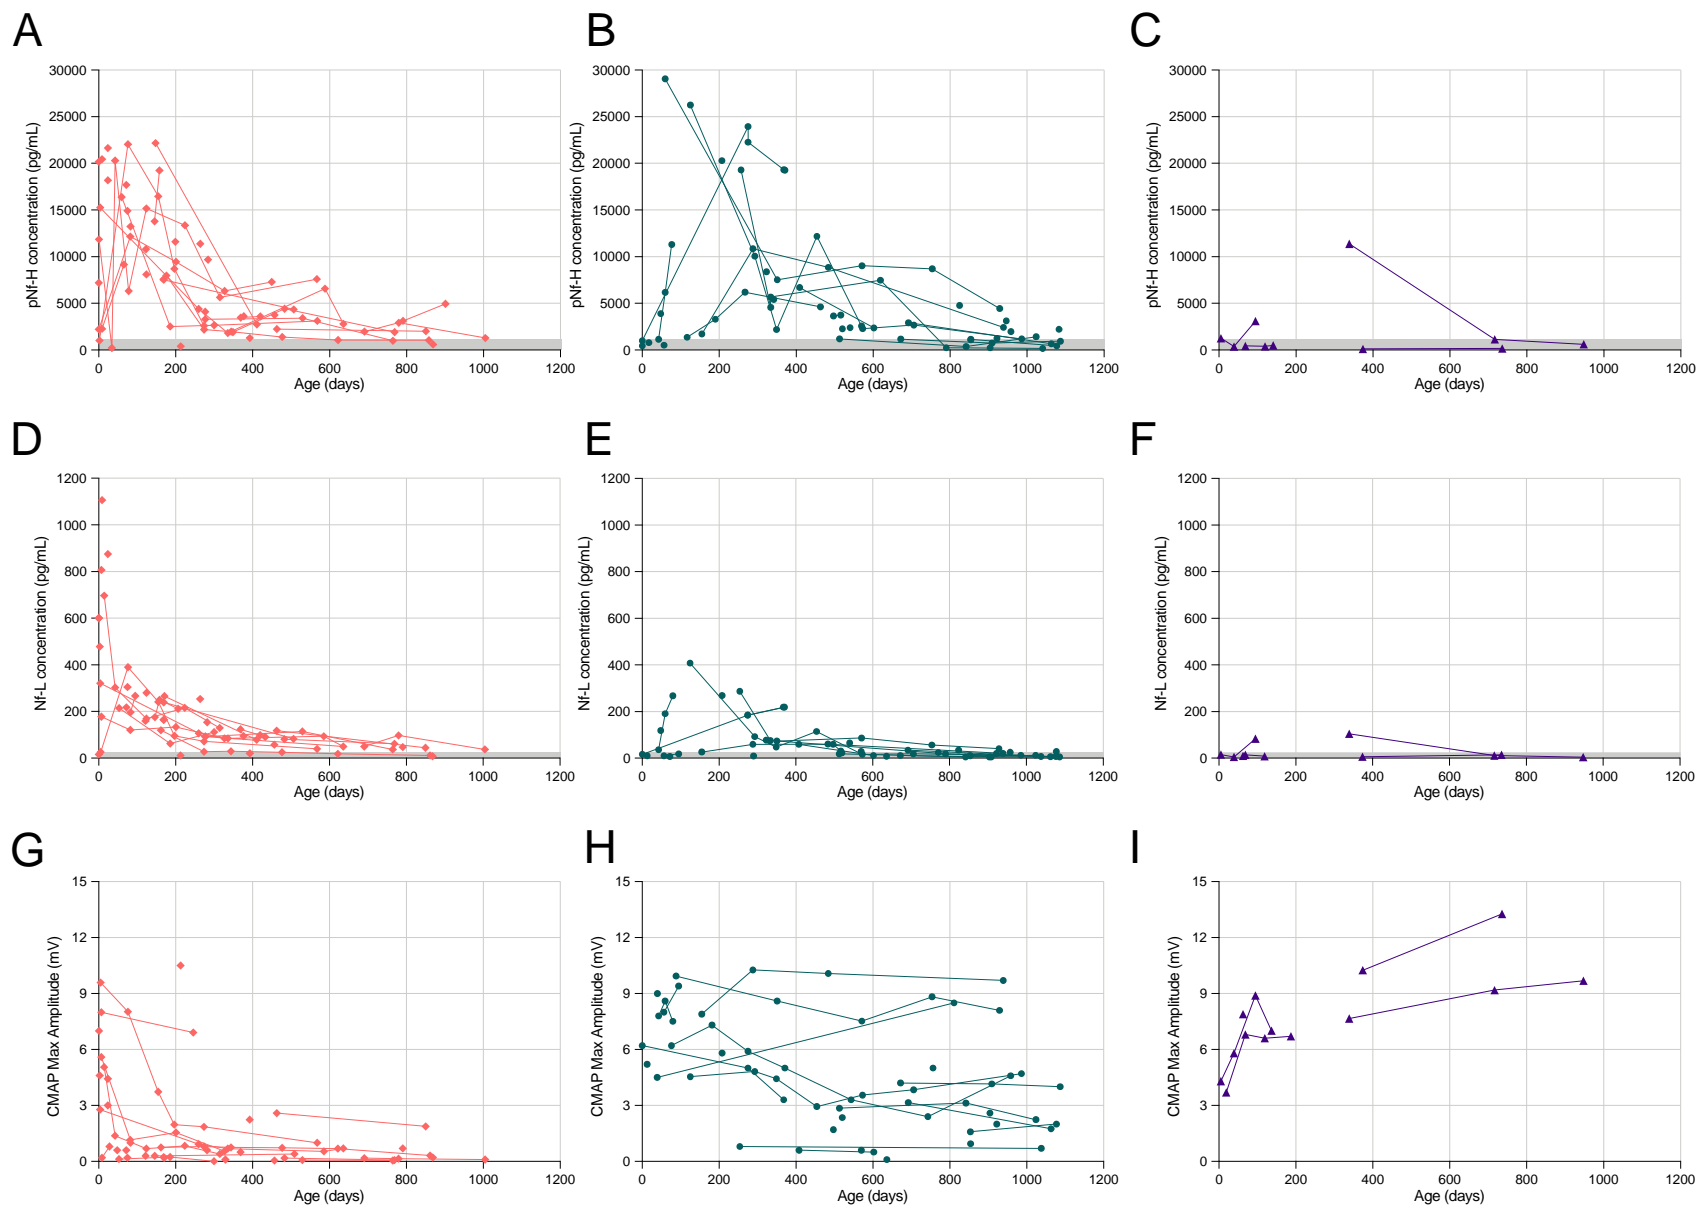

**Figure S1.** Natural history data in SMA patients with 2, 3, and 4 *SMN2* copies.
